# Supplementary material for: A procedurally activatable nanoplatform for chemo/chemodynamic synergistic therapy
Source: Royal Society of Chemistry journal article supplement (doi:10.1039/d1bm01940f), 2022-01-01
Supplement: d1bm01940f1.pdf [file d1bm01940f1.pdf]

## Electronic Supplementary Information

# A Procedurally Activatable Nanoplatfom for Chemo/Chemodynamic Synergistic Therapy

Wen Han,<sup>‡a</sup> Min Wang,<sup>‡a</sup> Huaming He,<sup>a</sup> Yifan Jiang,<sup>a</sup> Chunhua Lu<sup>\*a</sup> and Xiankun Tu<sup>\*b</sup>

- a. Key Laboratory for Analytical Science of Food Safety and Biology of the MOE, Fujian Provincial Key Laboratory of Analysis and Detection Technology for Food Safety, State Key Laboratory of Photocatalysis on Energy and Environment, College of Chemistry, Fuzhou University, Fuzhou 350116, P. R. China.
- b. Department of Neurosurgery, Fujian Medical University Union Hospital, Neurosurgical Institute of Fujian Province, Fuzhou, 350001, P.R. China.

E-mail: chunhualu@fzu.edu.cn; unionnstu@hotmail.com

<sup>‡</sup> These authors contributed equally to this work.

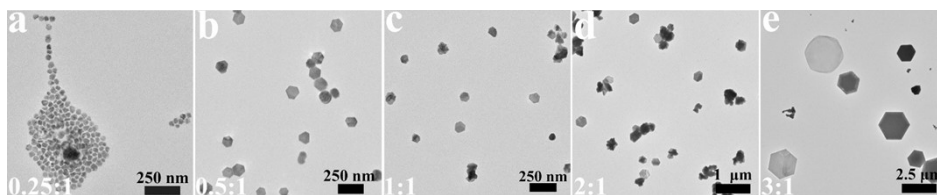

**Fig. S1** TEM images of  $\text{Cu}_9\text{S}_5$  NSs synthesized with  $\text{CuCl}_2 / \text{C}_6\text{H}_{10}\text{O}_4\text{S}_2$  molar ratios of (a) 0.25:1, (b) 0.5:1, (c) 1:1, (d) 2:1 and (e) 3:1.

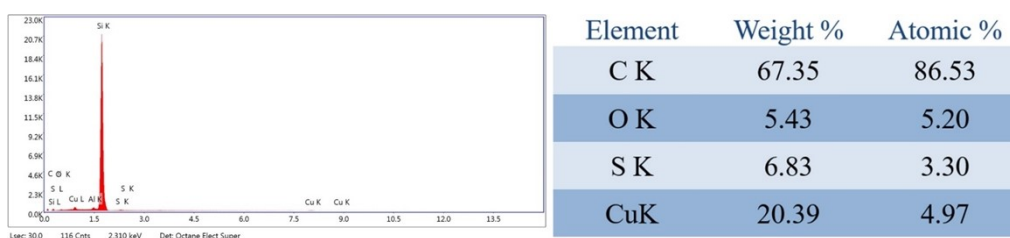

**Fig. S2** Energy-dispersive X-ray spectroscopy of  $\text{Cu}_9\text{S}_5$  NSs.

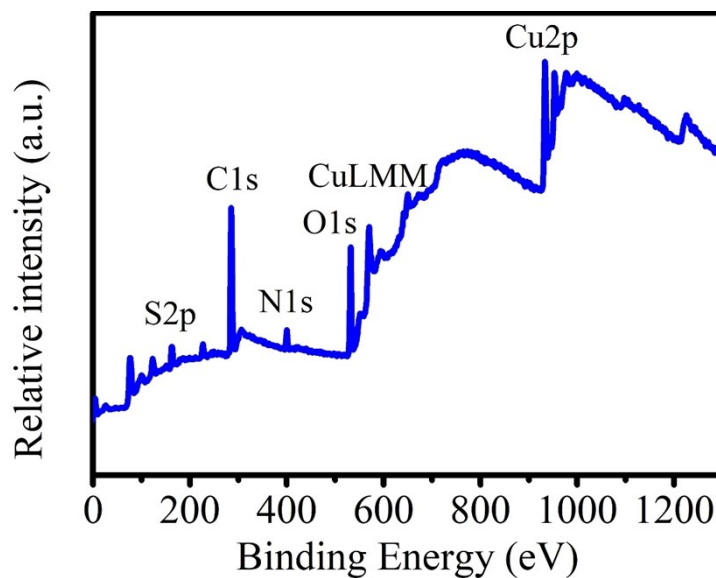

**Fig. S3** XPS spectrum of  $\text{Cu}_9\text{S}_5$  NSs.

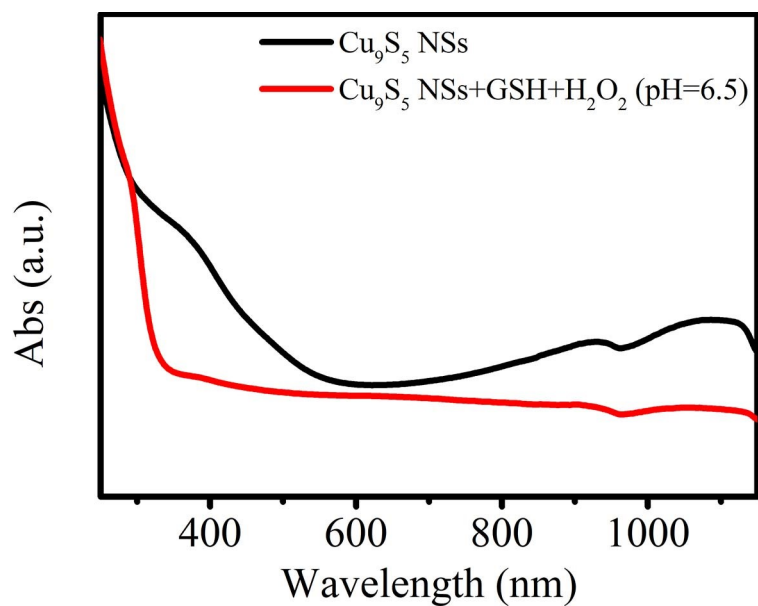

**Fig. S4** UV-vis absorption spectra of  $\text{Cu}_9\text{S}_5$  NSs in the presence or absence of GSH and  $\text{H}_2\text{O}_2$ .

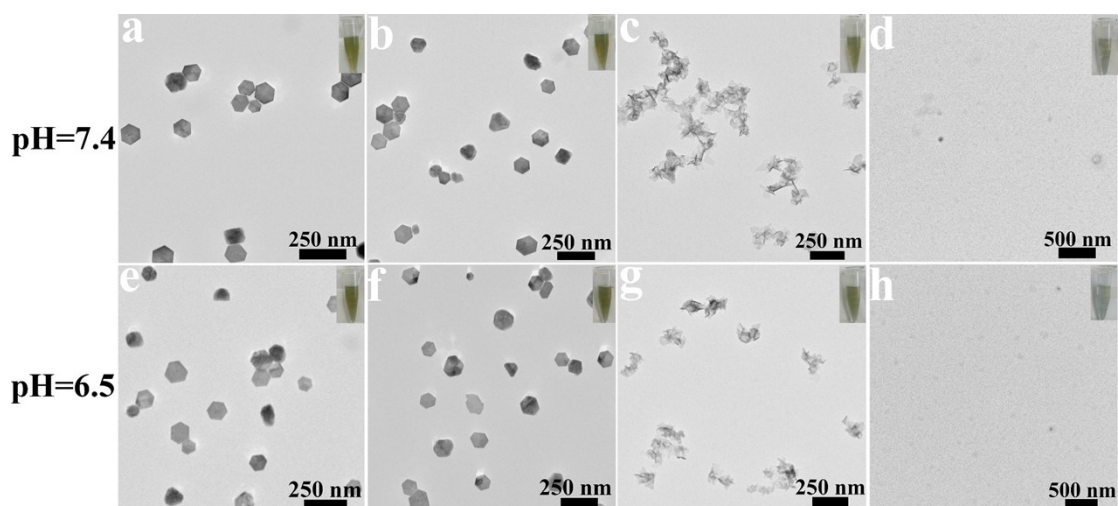

**Fig. S5** TEM images of  $\text{Cu}_9\text{S}_5$  NSs after different treatments for 1 h. (a) control, (b) GSH, (c)  $\text{H}_2\text{O}_2$ , (d) GSH+ $\text{H}_2\text{O}_2$ , (e) control at pH=6.5, (f) GSH, (g)  $\text{H}_2\text{O}_2$  and (h) GSH +  $\text{H}_2\text{O}_2$  ( $[\text{Cu}_9\text{S}_5 \text{ NSs}] = 100 \mu\text{g} \cdot \text{mL}^{-1}$ ,  $[\text{GSH}] = 1 \text{ mM}$ ,  $[\text{H}_2\text{O}_2] = 10 \text{ mM}$ ).

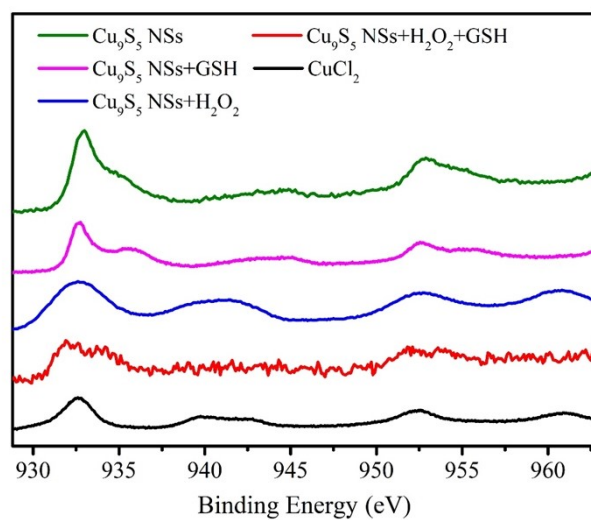

**Fig. S6** Cu 2p XPS spectra of Cu<sub>9</sub>S<sub>5</sub> NSs, Cu<sub>9</sub>S<sub>5</sub> NSs treated with GSH, Cu<sub>9</sub>S<sub>5</sub> NSs treated with H<sub>2</sub>O<sub>2</sub>, Cu<sub>9</sub>S<sub>5</sub> NSs treated with H<sub>2</sub>O<sub>2</sub>/GSH, and CuCl<sub>2</sub>.

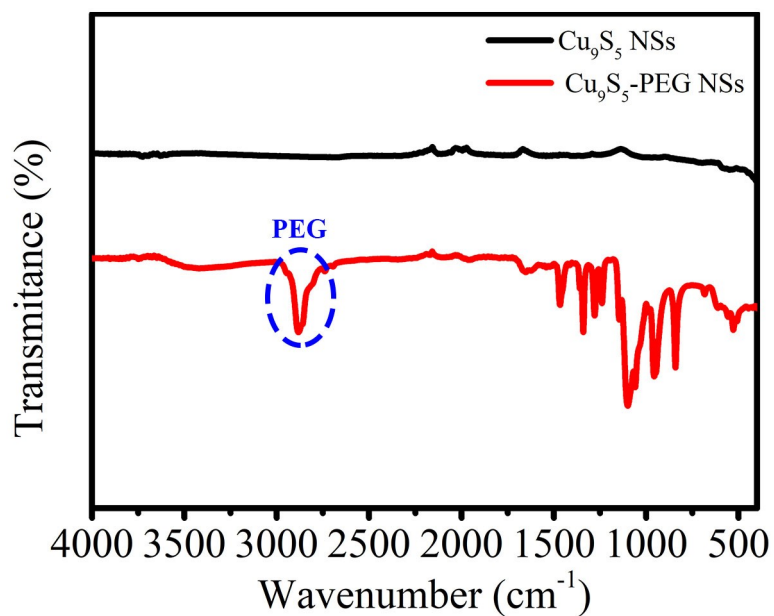

**Fig. S7** FTIR spectra of Cu<sub>9</sub>S<sub>5</sub> NSs, and Cu<sub>9</sub>S<sub>5</sub>-PEG NSs.

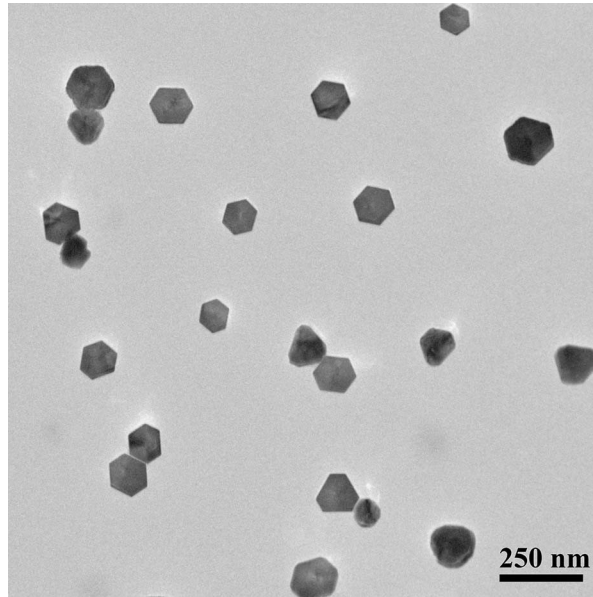

**Fig. S8** TEM image of  $\text{Cu}_9\text{S}_5$ -PEG NSs.

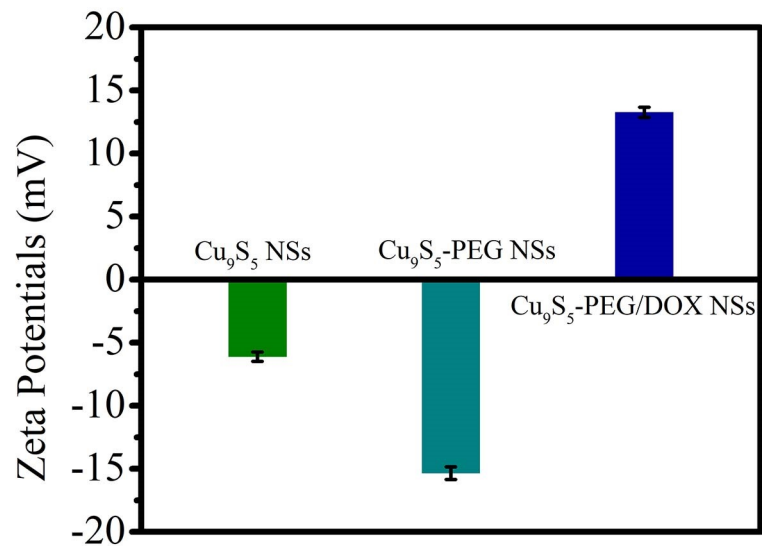

**Fig. S9** Zeta potentials of  $\text{Cu}_9\text{S}_5$  NSs,  $\text{Cu}_9\text{S}_5$ -PEG NSs, and  $\text{Cu}_9\text{S}_5$ -PEG/DOX NSs.

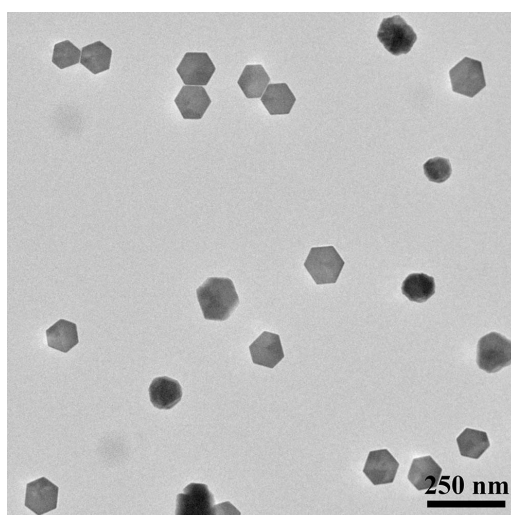

**Fig. S10** TEM image of  $\text{Cu}_9\text{S}_5$ -PEG/DOX NSs.

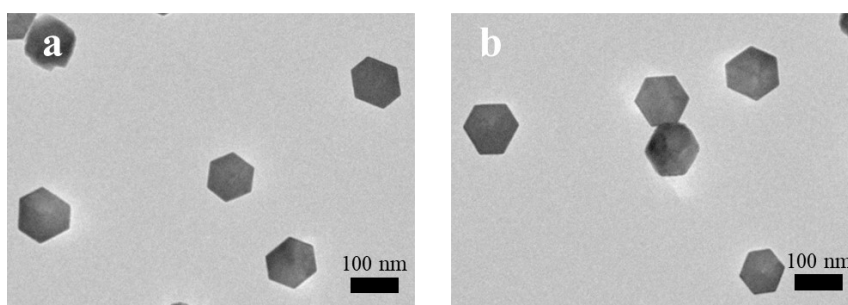

**Fig. S11** TEM images of  $\text{Cu}_9\text{S}_5$ -PEG/DOX NSs in different environments: (a) medium and (b) FBS.

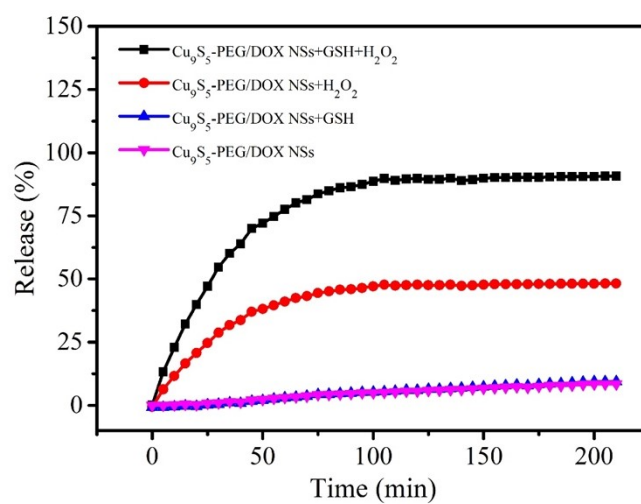

**Fig. S12** The DOX releasing rates of  $\text{Cu}_9\text{S}_5$ -PEG/DOX NSs after treatment with different conditions.

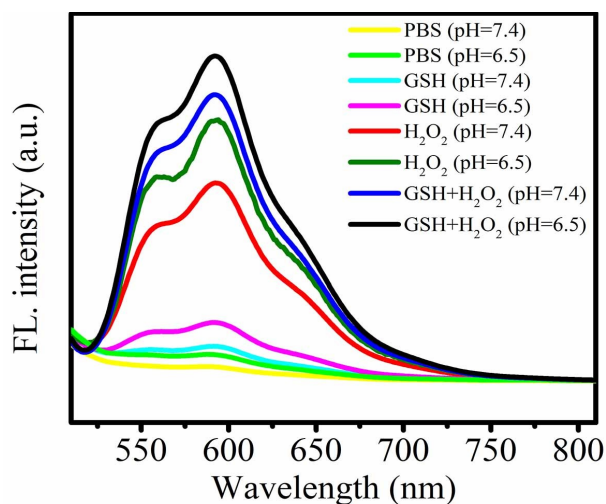

**Fig. S13** Fluorescent spectra of Cu<sub>9</sub>S<sub>5</sub>-PEG/DOX NSs after treatment with different conditions.

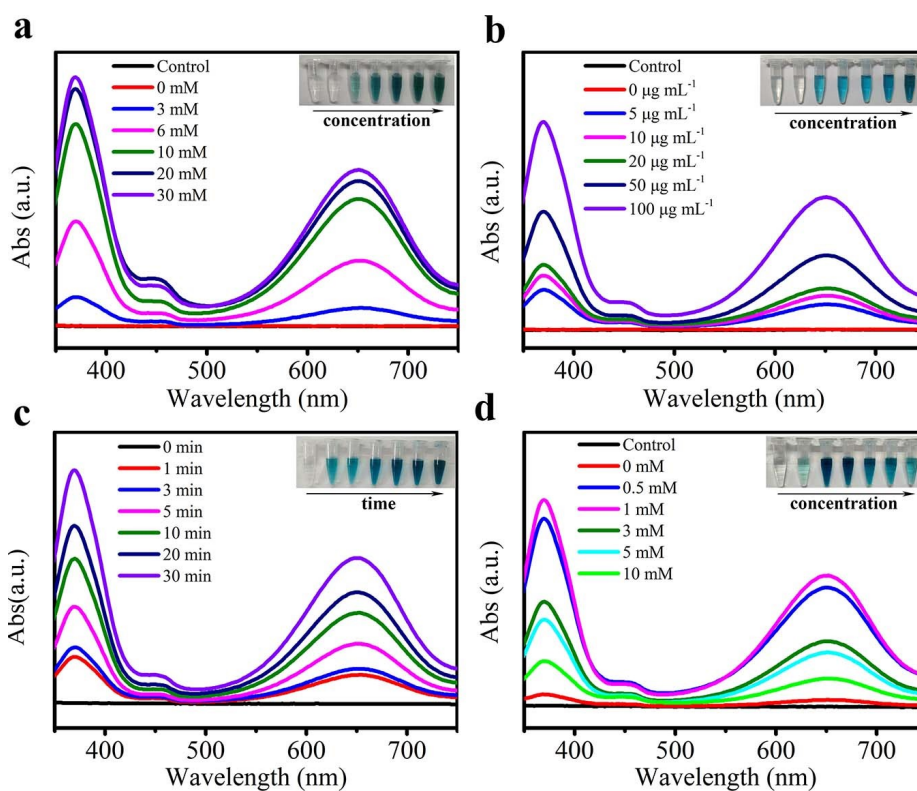

**Fig. S14** The UV-vis absorption spectra and visual color changes of TMB aqueous solutions as catalyzed by Cu<sub>9</sub>S<sub>5</sub> NSs (a) with GSH (1 mM) at different concentrations of H<sub>2</sub>O<sub>2</sub>, (b) with GSH (1 mM) and H<sub>2</sub>O<sub>2</sub> (10 mM) at different concentrations of Cu<sub>9</sub>S<sub>5</sub> NSs, (c) with GSH (1 mM) and H<sub>2</sub>O<sub>2</sub> (10 mM) at different reaction times, (d) with H<sub>2</sub>O<sub>2</sub> (10 mM) at different concentrations of GSH.



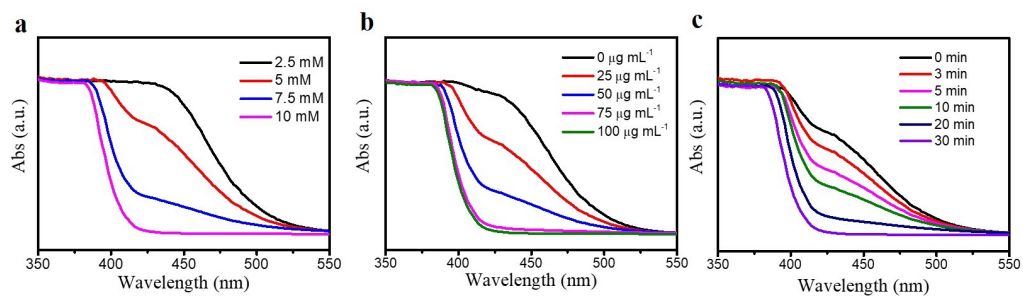

**Fig. S15** Decrease of UV-Vis absorption at 410 nm showing the GSH depletion from the redox reaction as catalyzed by  $\text{Cu}_9\text{S}_5$  NSs (a) with GSH (1 mM) at different concentrations of  $\text{H}_2\text{O}_2$ , (b) with GSH (1 mM) and  $\text{H}_2\text{O}_2$  (10 mM) at different concentrations of  $\text{Cu}_9\text{S}_5$  NSs, (c) with GSH (1 mM) and  $\text{H}_2\text{O}_2$  (10 mM) at different reaction times.

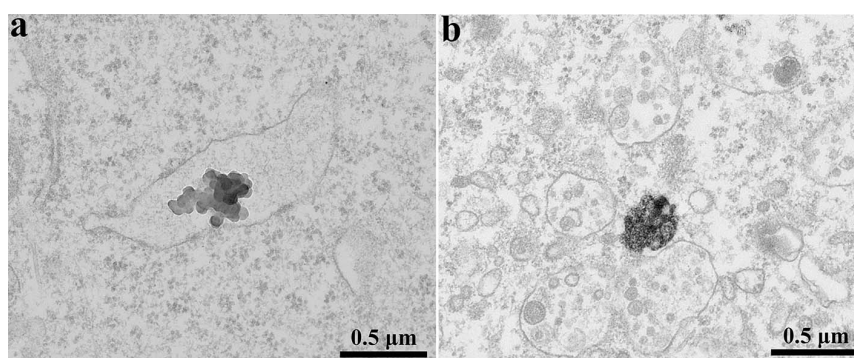

**Fig. S16** Bio-TEM images of (a) L02 and (b) MCF-7 cells after incubating with  $\text{Cu}_9\text{S}_5$ -PEG/DOX NSs for 6 h.

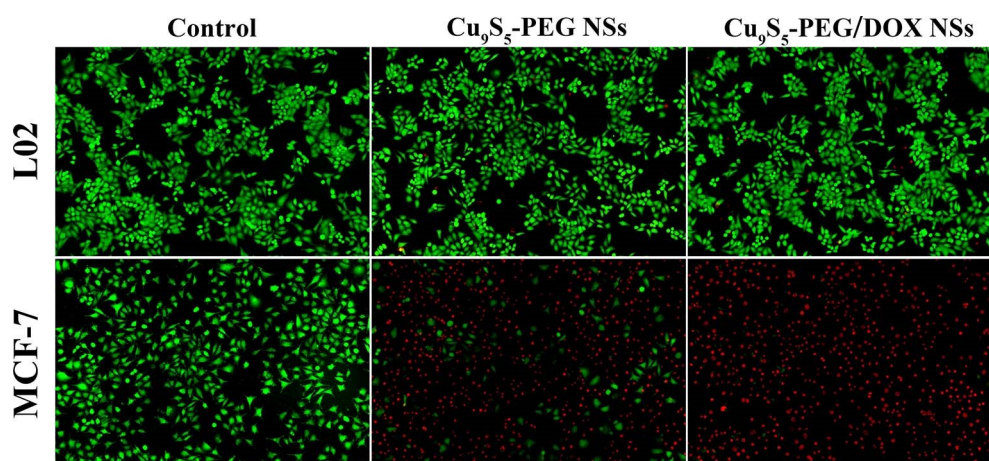

**Fig. S17** Live/dead staining of L02 and MCF-7 cells. Green fluorescence shows the live cells stained with calcein AM, and red fluorescence shows the dead cells stained with PI (scale = 100  $\mu\text{m}$ ).



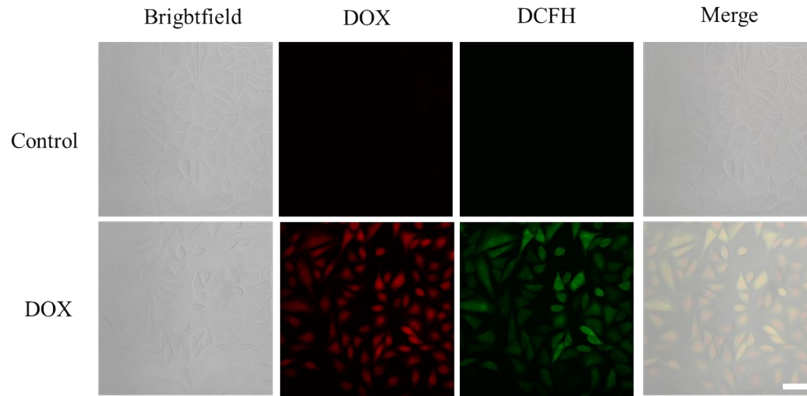

**Fig. S18** Confocal fluorescence images of DCFH-DA stained MCF-7 cells after incubation with DOX (scale = 50  $\mu\text{m}$ .)

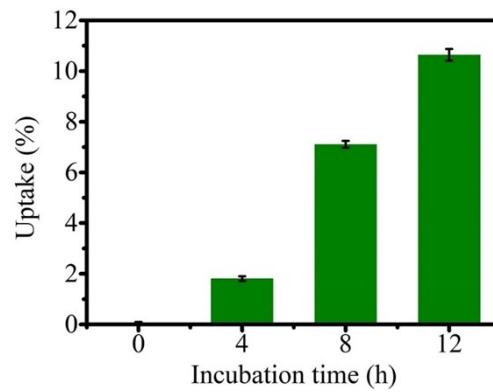

**Fig. S19** Intracellular phagocytosis of  $\text{Cu}_9\text{S}_5$ -PEG/DOX NSs after incubating for 0, 4, 8, and 12 h, respectively.

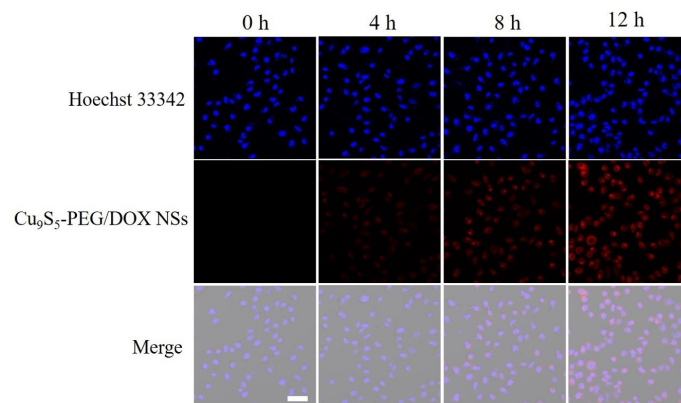

**Fig. S20** Confocal fluorescence images of MCF-7 cells treated with  $\text{Cu}_9\text{S}_5$ -PEG/DOX NSs for 0 h, 4 h, 8 h, and 12 h (Scale = 50  $\mu\text{m}$ ).

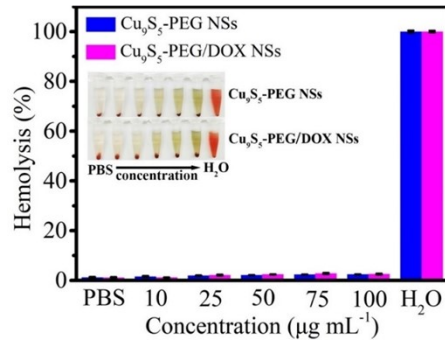

**Fig. S21** Relative hemolysis ratios of H<sub>2</sub>O, PBS, and different concentrations of Cu<sub>9</sub>S<sub>5</sub>-PEG NSs and Cu<sub>9</sub>S<sub>5</sub>-PEG/DOX NSs. The inset was the corresponding photos.

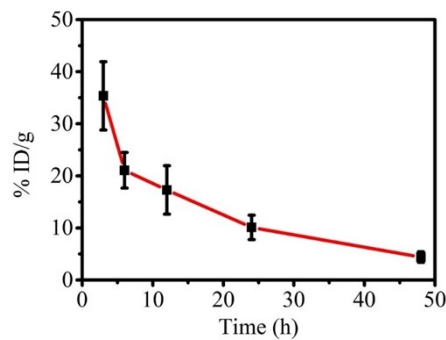

**Fig. S22** Blood-circulation curve of intravenously injected Cu<sub>9</sub>S<sub>5</sub>-PEG/DOX NSs.

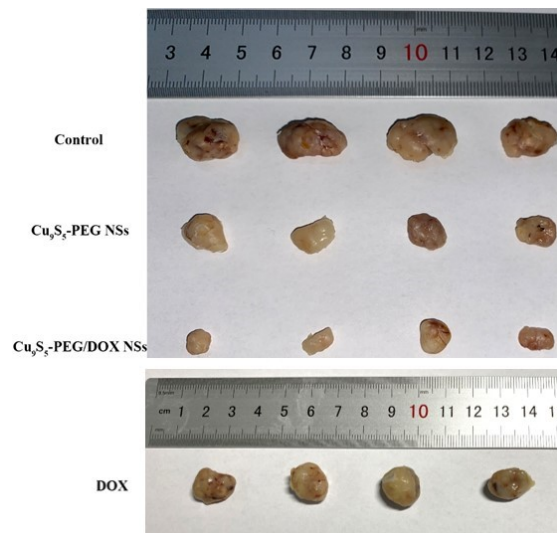

**Fig. S23** Visual images of excised tumor treated with PBS (control), DOX, Cu<sub>9</sub>S<sub>5</sub>-FS NSs, and Cu<sub>9</sub>S<sub>5</sub>-PEG/DOX NSs on the 14th day.

The tumor inhibition rates of DOX, Cu<sub>9</sub>S<sub>5</sub>-PEG NSs and Cu<sub>9</sub>S<sub>5</sub>-PEG/DOX NSs calculated by Fig. 4c were 30.84, 55.52 and 85.52 %, respectively. The synergistic treatment improved outcomes by nearly 30%.

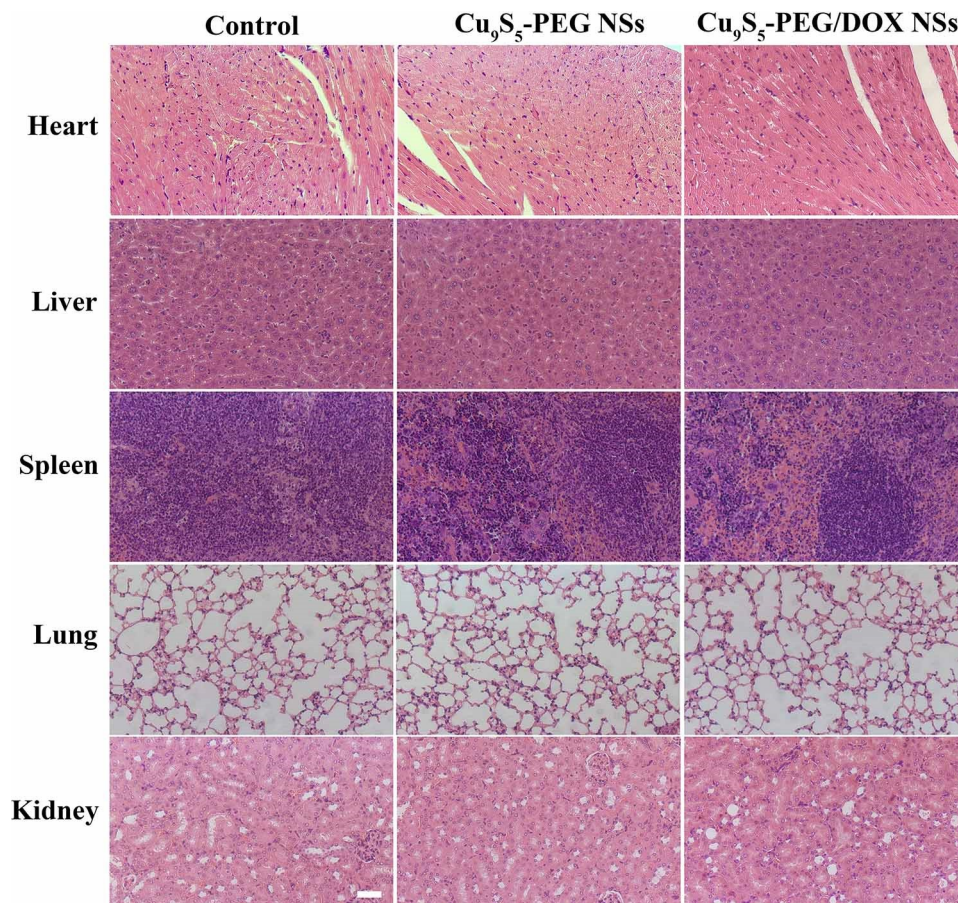

**Fig. S24** H&E-stained tissue slices from major organs (heart, liver, spleen, lung, and kidney) of different groups (Scale = 50  $\mu$ m).

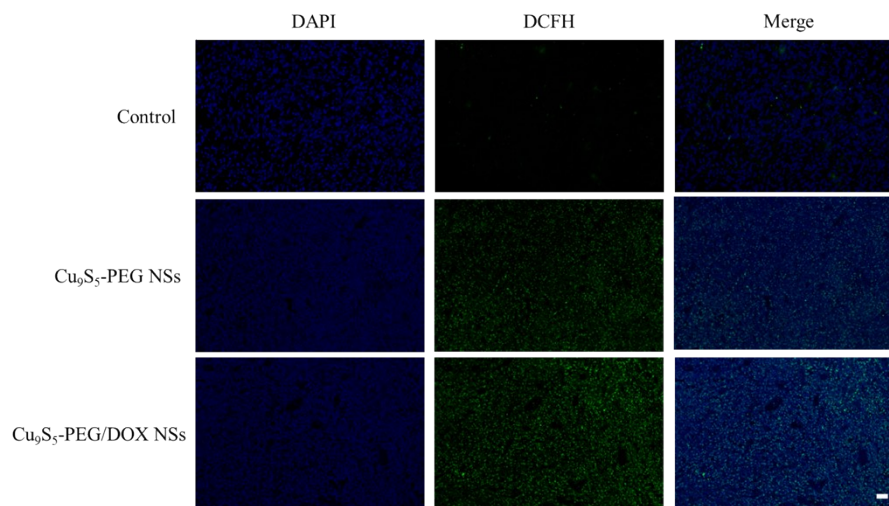

**Fig. S25** DCFH staining of tumor slices of each groups. ROS were stained with DCFH (green). The nucleus was stained with DAPI (blue) (Scale = 50  $\mu$ m).
